# Supplementary material for: Properdin and factor H production by human dendritic cells modulates their T‐cell stimulatory capacity and is regulated by IFN‐γ
Source: PubMed Central journal article supplement (PMC5363362; doi:10.1002/eji.201646703), 2017-03-13
Supplement: EJI-47-470-s002.pdf [file EJI-47-470-s002.pdf]

# European Journal of Immunology

Supporting Information

for

DOI 10.1002/eji.201646703

Karen O. Dixon, Joseph O'Flynn, Ngaisah Klar-Mohamad, Mohamed R. Daha  
and Cees van Kooten

**Properdin and factor H production by human dendritic cells modulates their  
T-cell stimulatory capacity and is regulated by IFN- $\gamma$**

650 **Supplementary Figures:**

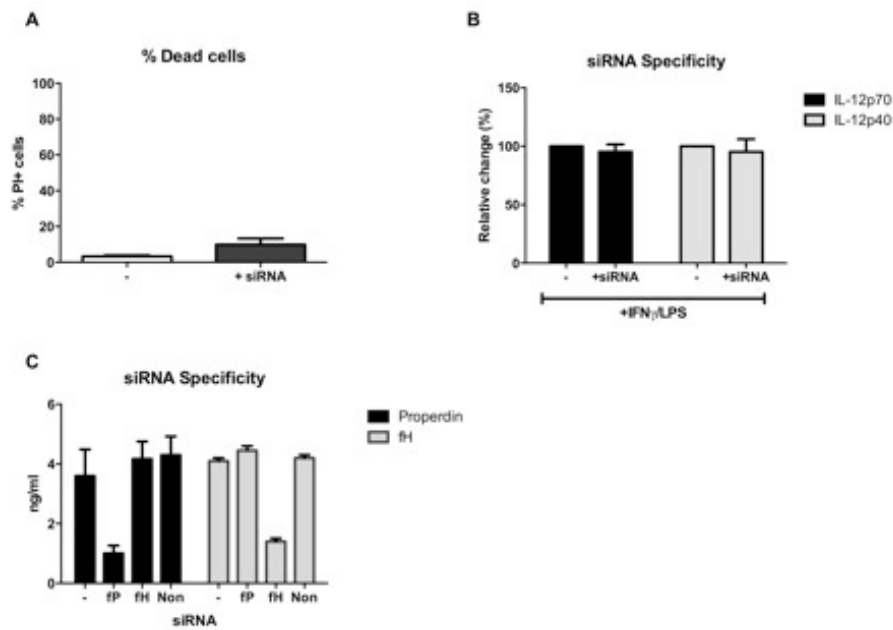

651

652 **Supplementary Figure 1:** DCs were either non-treated or treated with siRNA targeting  
 653 fP+fH together, and assessed for cell viability (A). After 24 hours of culture, under  
 654 IFN $\gamma$ +LPS stimulation, supernatants were harvested, IL-12p40 and IL-12p70 was measured  
 655 by ELISA (B). 100% represents the level of IL-12p40 or IL-12p70 with IFN $\gamma$ +LPS  
 656 stimulation but without siRNA. The level of IL-12p40/p70 in cells with IFN $\gamma$ +LPS  
 657 stimulation and siRNA was calculated relative to the non-siRNA treated counterparts from  
 658 the same donor. DCs were either non treated, or treated with siRNA targeting fP, fH or non-  
 659 specific (non) target. (C) After 24 hours of culture, supernatants were harvested and fP and  
 660 fH was measured by ELISA.

661

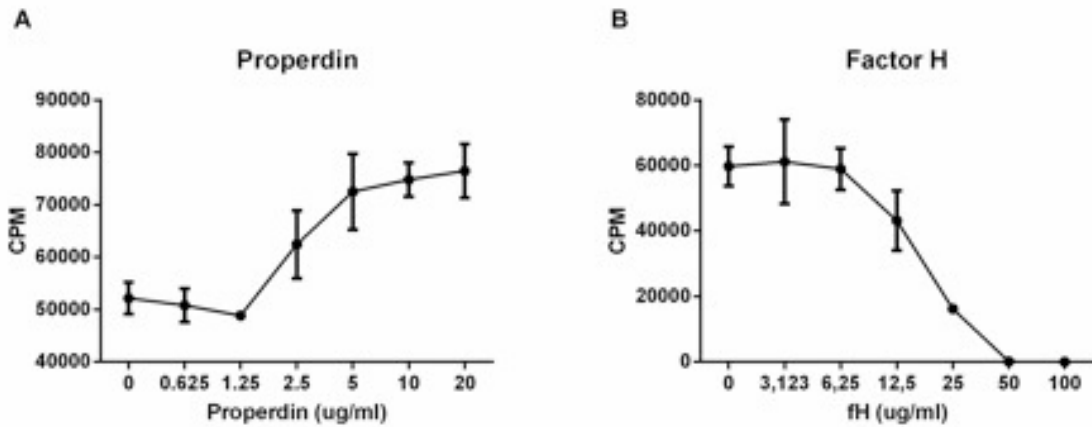

662  
 663 **Supplementary Figure 2:** Total CD4<sup>+</sup> T cells (100,000/well) were stimulated with  
 664  $\alpha$ CD3/ $\alpha$ CD28 coated beads for 5 days in the presence of increasing concentrations of (A) fP  
 665 or (B) fH. T cell proliferation was determined at day 5 of culture by <sup>3</sup>[H] incorporation. Data  
 666 shown are the mean  $\pm$ SD of triplicate cultures and are representative of 2 independent  
 667 experiments.

668

669

**Supplementary Table 1:** CT value ranges obtained in DC and toIDC for CFP and CFH under steady state (medium) or stimulated conditions (IFN $\gamma$ /LPS).

| DC           | fP          | fH          | toIDC        | fP          | fH          |
|--------------|-------------|-------------|--------------|-------------|-------------|
| Medium       | 23.3 - 26.4 | 25.0 - 30.3 | Medium       | 22.1 – 23.6 | 22.5 – 24.3 |
| IFN $\gamma$ | 24.7 - 27.6 | 23.0 - 27.8 | IFN $\gamma$ | 23.7 – 26.5 | 20.4 – 23.2 |
| LPS          | 23.3 - 26.3 | 25.1 - 30.9 | LPS          | 20.9 – 23.7 | 21.8 – 25.3 |

670

671
